# Supplementary material for: TrakEM2 Software for Neural Circuit Reconstruction
Source: PubMed Central journal article supplement (PMC3378562; doi:10.1371/journal.pone.0038011), 2012-06-19

section 344

A

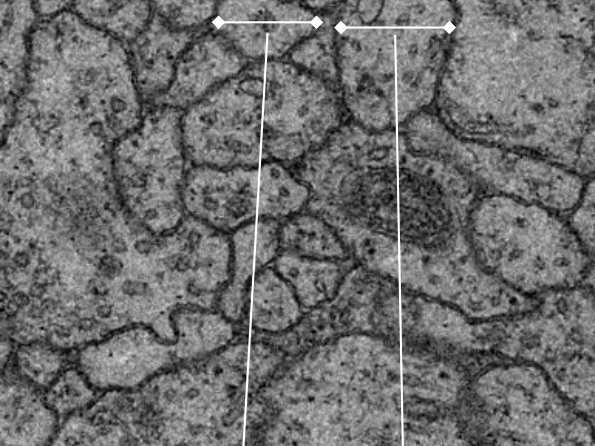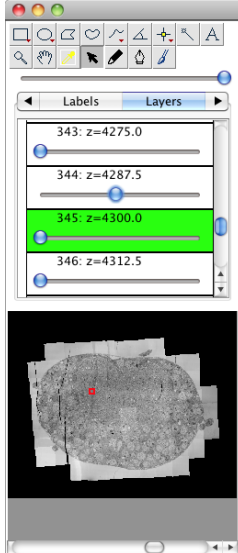

345/459 z=4300.0 -- abd-images 94012.0x76972.0 nm

C

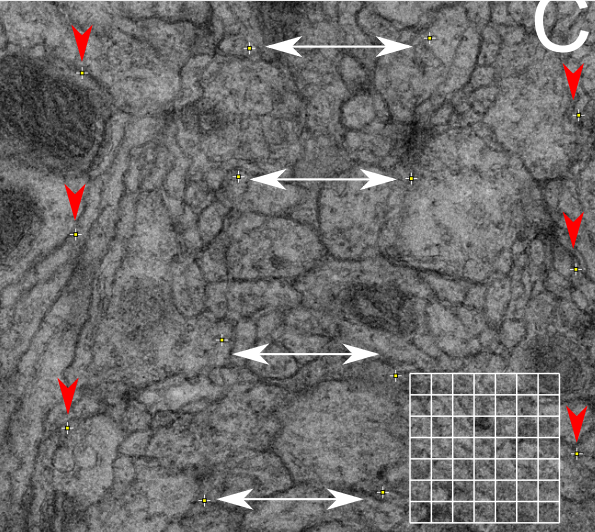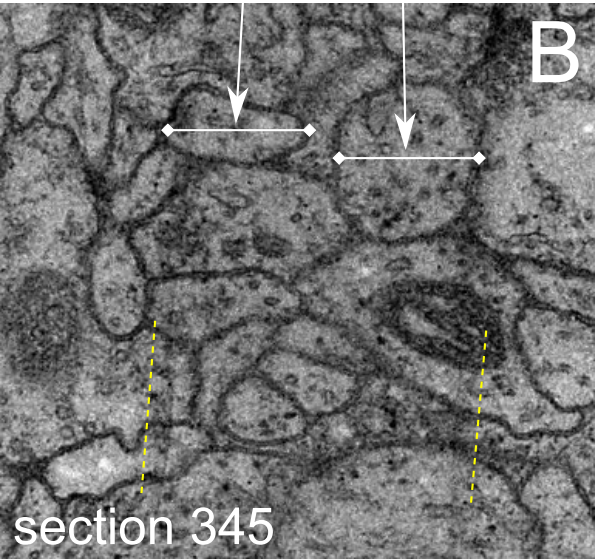

B

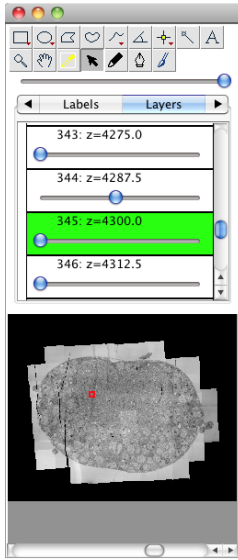

345/459 z=4300.0 -- abd-images 94012.0x76972.0 nm

D

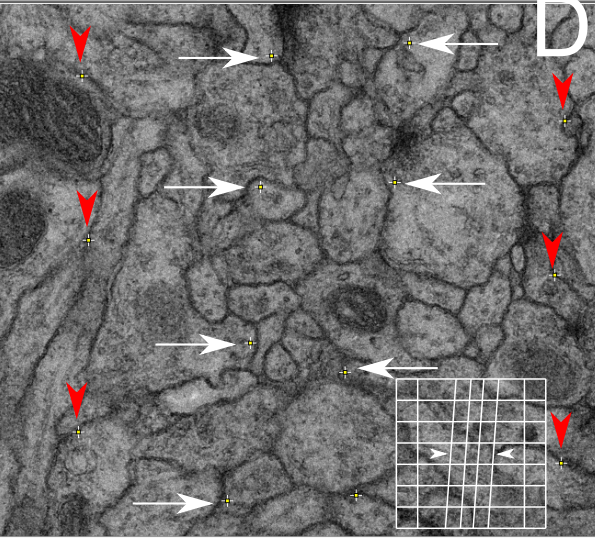

Supplement: pone.0038011.s003.pdf [file pone.0038011.s003.pdf]
