# Supplementary material for: TrakEM2 Software for Neural Circuit Reconstruction
Source: PubMed Central journal article supplement (PMC3378562; doi:10.1371/journal.pone.0038011), 2012-06-19

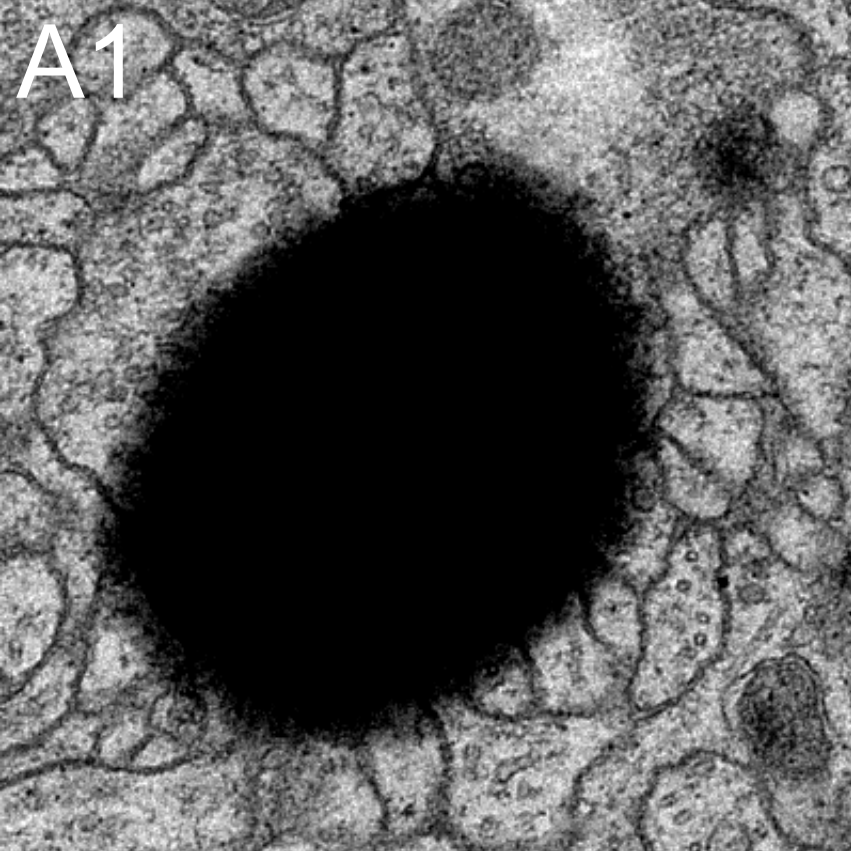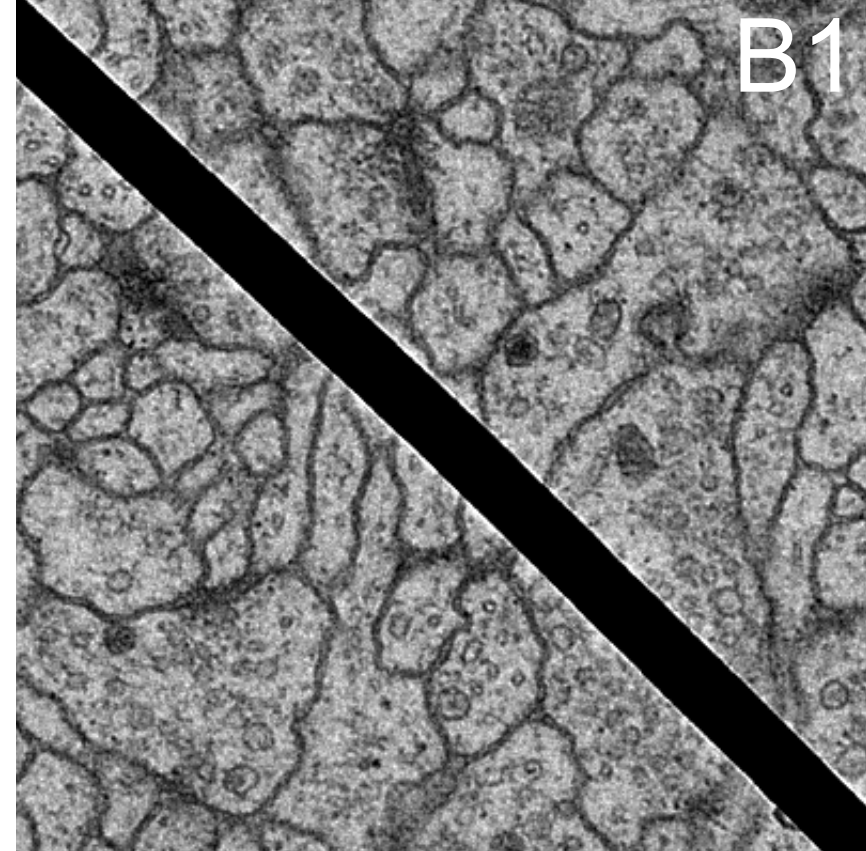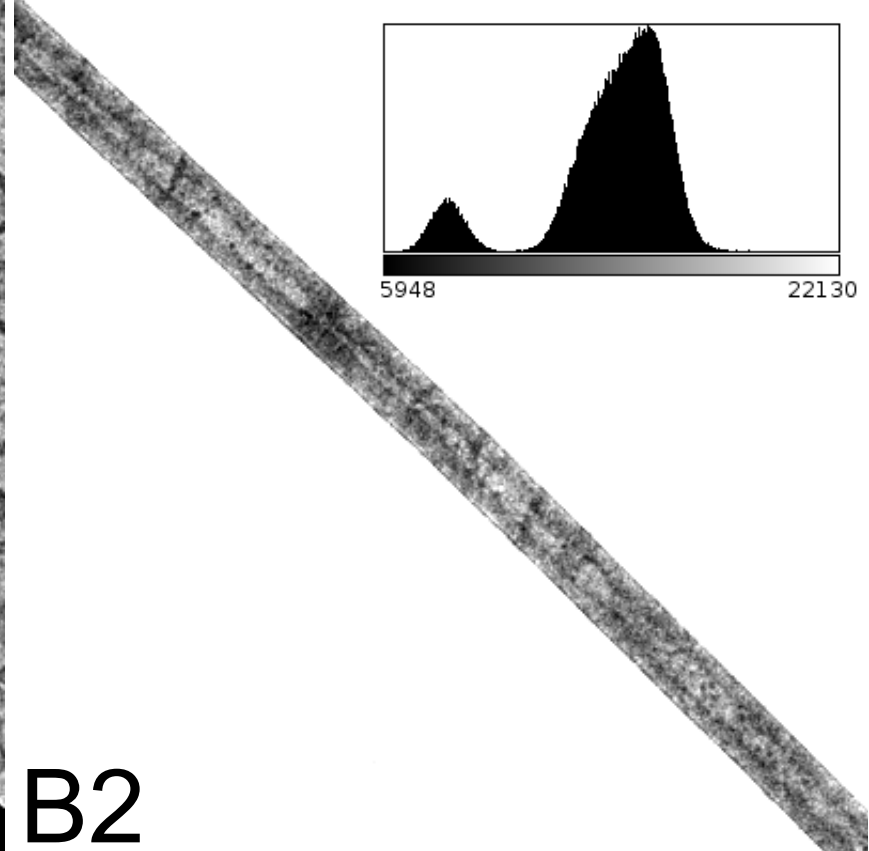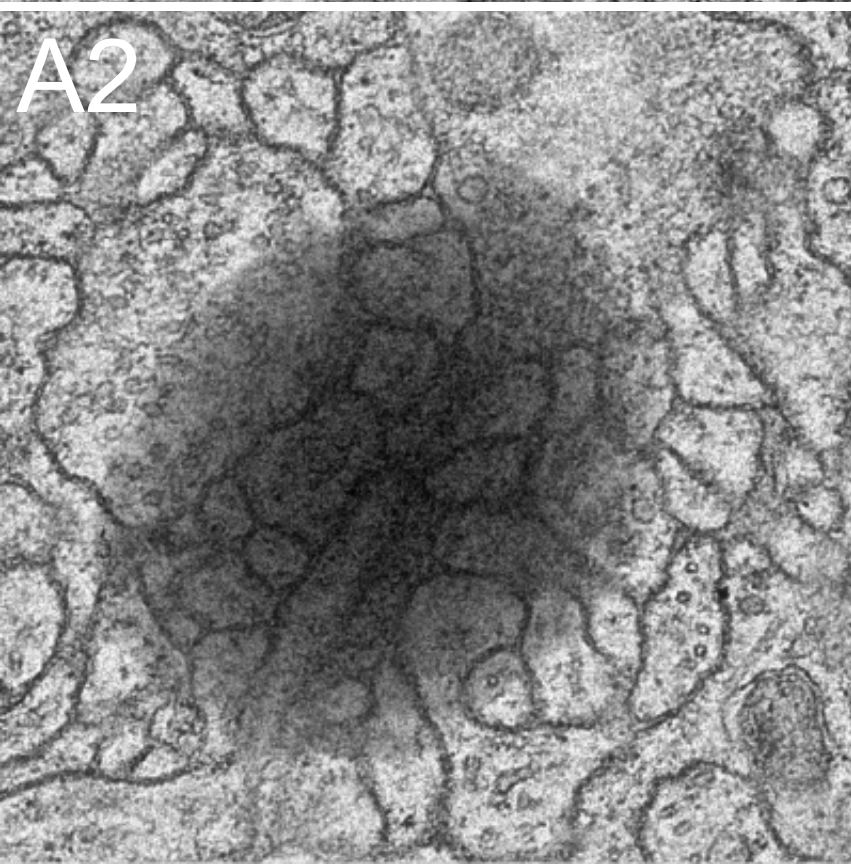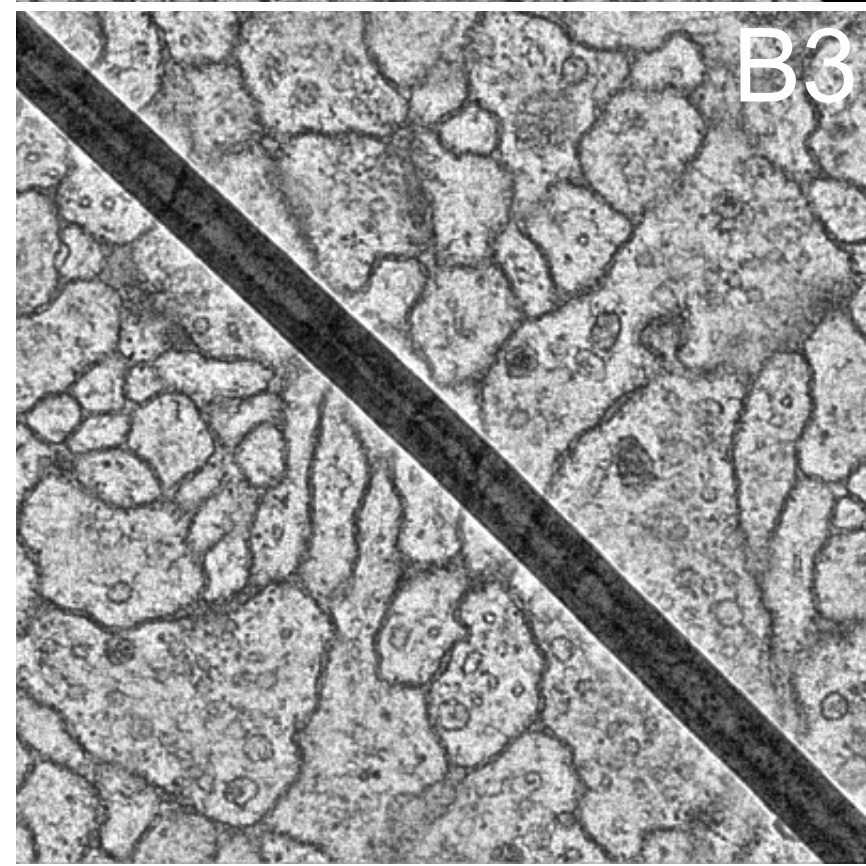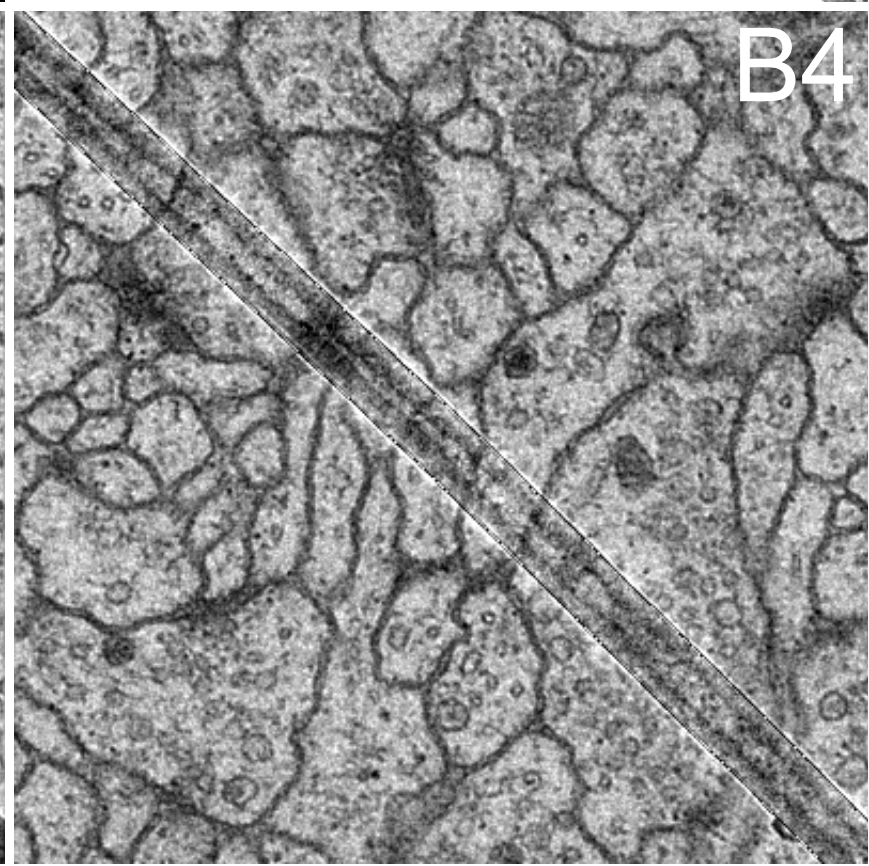

Supplement: pone.0038011.s005.pdf [file pone.0038011.s005.pdf]
