# Supplementary material for: TrakEM2 Software for Neural Circuit Reconstruction
Source: PubMed Central journal article supplement (PMC3378562; doi:10.1371/journal.pone.0038011), 2012-06-19
Supplement: pone.0038011.s008.pdf [file pone.0038011.s008.pdf]

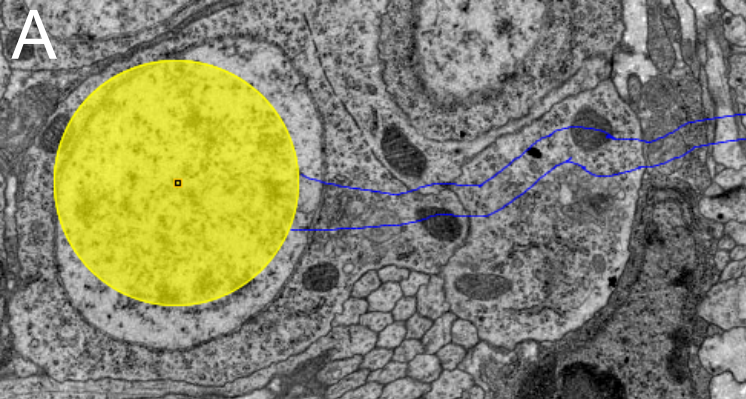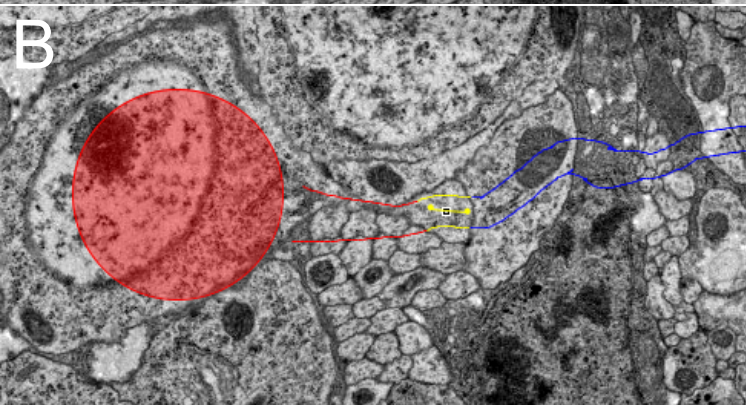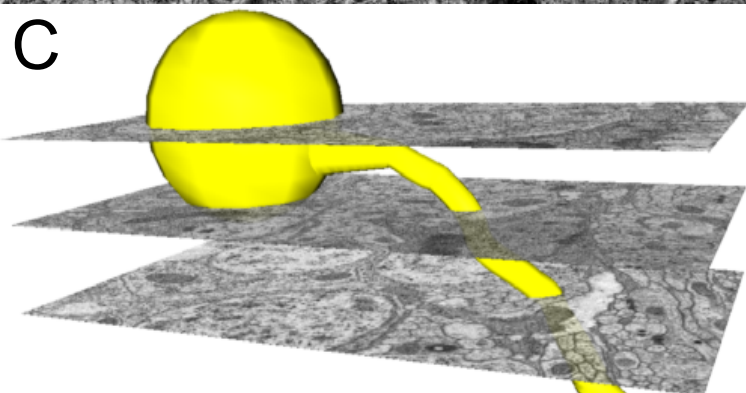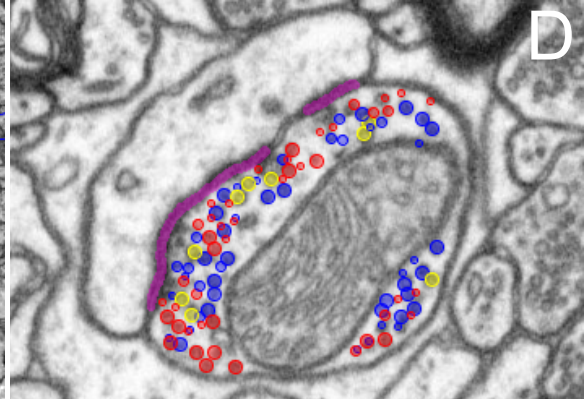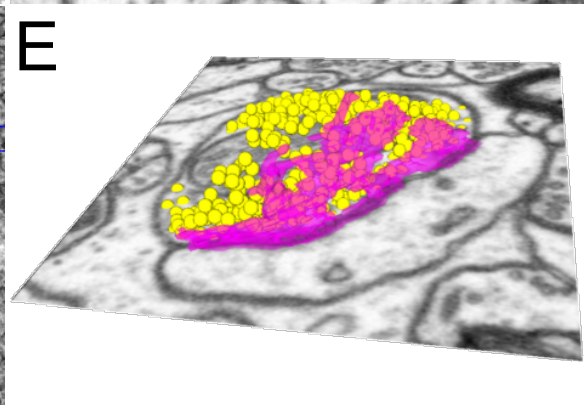

**F**

Ball results

| File   | Edit | Font  |         |         |     |        |  |
|--------|------|-------|---------|---------|-----|--------|--|
| units  | id   | index | x       | y       | z   | radius |  |
| 471 nm | 160  | 471   | 5105.49 | 4777.42 | 30  | 20.69  |  |
| 472 nm | 160  | 472   | 4735.49 | 4582.42 | 205 | 20.69  |  |
| 473 nm | 160  | 473   | 4805.49 | 4307.42 | 120 | 20.69  |  |
| 474 nm | 160  | 474   | 4885.49 | 4327.42 | 120 | 20.69  |  |
| 475 nm | 160  | 475   | 4720.49 | 4297.42 | 55  | 20.69  |  |
| 476 nm | 160  | 476   | 4710.49 | 4362.42 | 55  | 20.69  |  |
| 477 nm | 160  | 477   | 4365.49 | 4657.42 | 70  | 20.69  |  |
| 478 nm | 160  | 478   | 4400.49 | 4662.42 | 70  | 20.69  |  |
| 479 nm | 160  | 479   | 4435.49 | 4717.42 | 70  | 20.69  |  |
| 480 nm | 160  | 480   | 4500.49 | 4657.42 | 70  | 20.69  |  |
| 481 nm | 160  | 481   | 4425.49 | 4567.42 | 70  | 20.69  |  |
