# Supplementary material for: TrakEM2 Software for Neural Circuit Reconstruction
Source: PubMed Central journal article supplement (PMC3378562; doi:10.1371/journal.pone.0038011), 2012-06-19
Supplement: pone.0038011.s009.pdf [file pone.0038011.s009.pdf]

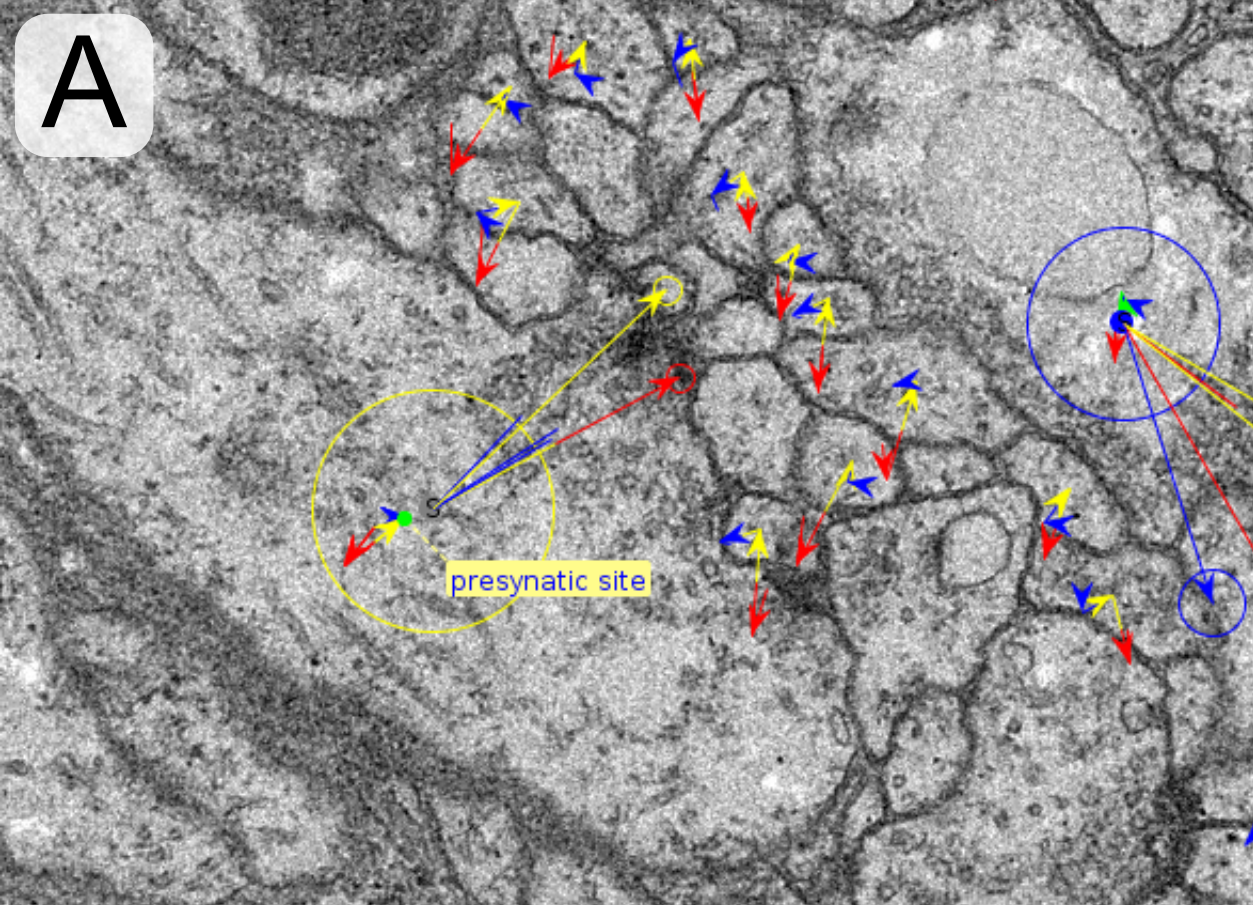

**B**

Tree path measurements

|    | units | id     | XA      | YA      | Layer A | XB       | YB       | Layer B | distance | N nodes | N branch |
|----|-------|--------|---------|---------|---------|----------|----------|---------|----------|---------|----------|
| 1  | nm    | 105311 | 5599.51 | 5833.33 | 118     | 8180.05  | 9960.61  | 196     | 35289.46 | 191     | 1        |
| 2  | nm    | 105311 | 5599.51 | 5833.33 | 118     | 9221.50  | 9776.58  | 161     | 38985.44 | 191     | 6        |
| 3  | nm    | 105311 | 5599.51 | 5833.33 | 118     | 8173.68  | 9962.16  | 197     | 35345.91 | 192     | 1        |
| 4  | nm    | 105311 | 5599.51 | 5833.33 | 118     | 9657.42  | 9777.17  | 159     | 41330.34 | 194     | 7        |
| 5  | nm    | 105311 | 5599.51 | 5833.33 | 118     | 9502.19  | 10048.04 | 150     | 41406.76 | 203     | 7        |
| 6  | nm    | 105311 | 5599.51 | 5833.33 | 118     | 8458.57  | 9831.38  | 220     | 38744.73 | 214     | 2        |
| 7  | nm    | 105311 | 5599.51 | 5833.33 | 118     | 9811.43  | 9655.46  | 232     | 46050.27 | 239     | 7        |
| 8  | nm    | 105311 | 5599.51 | 5833.33 | 118     | 10259.96 | 9713.48  | 172     | 49170.01 | 240     | 13       |
| 9  | nm    | 105311 | 5599.51 | 5833.33 | 118     | 9799.04  | 9547.12  | 225     | 46849.86 | 246     | 8        |
| 10 | nm    | 105311 | 5599.51 | 5833.33 | 118     | 9776.57  | 9682.87  | 220     | 47764.86 | 251     | 9        |
| 11 | nm    | 105311 | 5599.51 | 5833.33 | 118     | 10129.82 | 9404.53  | 83      | 51416.46 | 274     | 14       |
| 12 | nm    | 105311 | 5599.51 | 5833.33 | 118     | 9895.04  | 9581.52  | 80      | 50334.41 | 275     | 12       |
| 13 | nm    | 105311 | 5599.51 | 5833.33 | 118     | 10171.80 | 9558.58  | 99      | 53029.04 | 289     | 15       |
| 14 | nm    | 105311 | 5599.51 | 5833.33 | 118     | 10213.79 | 9924.05  | 255     | 54210.45 | 293     | 12       |
| 15 | nm    | 105311 | 5599.51 | 5833.33 | 118     | 8662.87  | 9059.87  | 37      | 61144.24 | 372     | 17       |
| 16 | nm    | 105311 | 5599.51 | 5833.33 | 118     | 8676.82  | 9004.19  | 31      | 61702.25 | 378     | 18       |
| 17 | nm    | 105311 | 5599.51 | 5833.33 | 118     | 8590.16  | 9015.95  | 24      | 63187.84 | 386     | 19       |
| 18 | nm    | 105311 | 5599.51 | 5833.33 | 118     | 8736.79  | 8771.76  | 48      | 62754.20 | 386     | 20       |

pre [root] pre

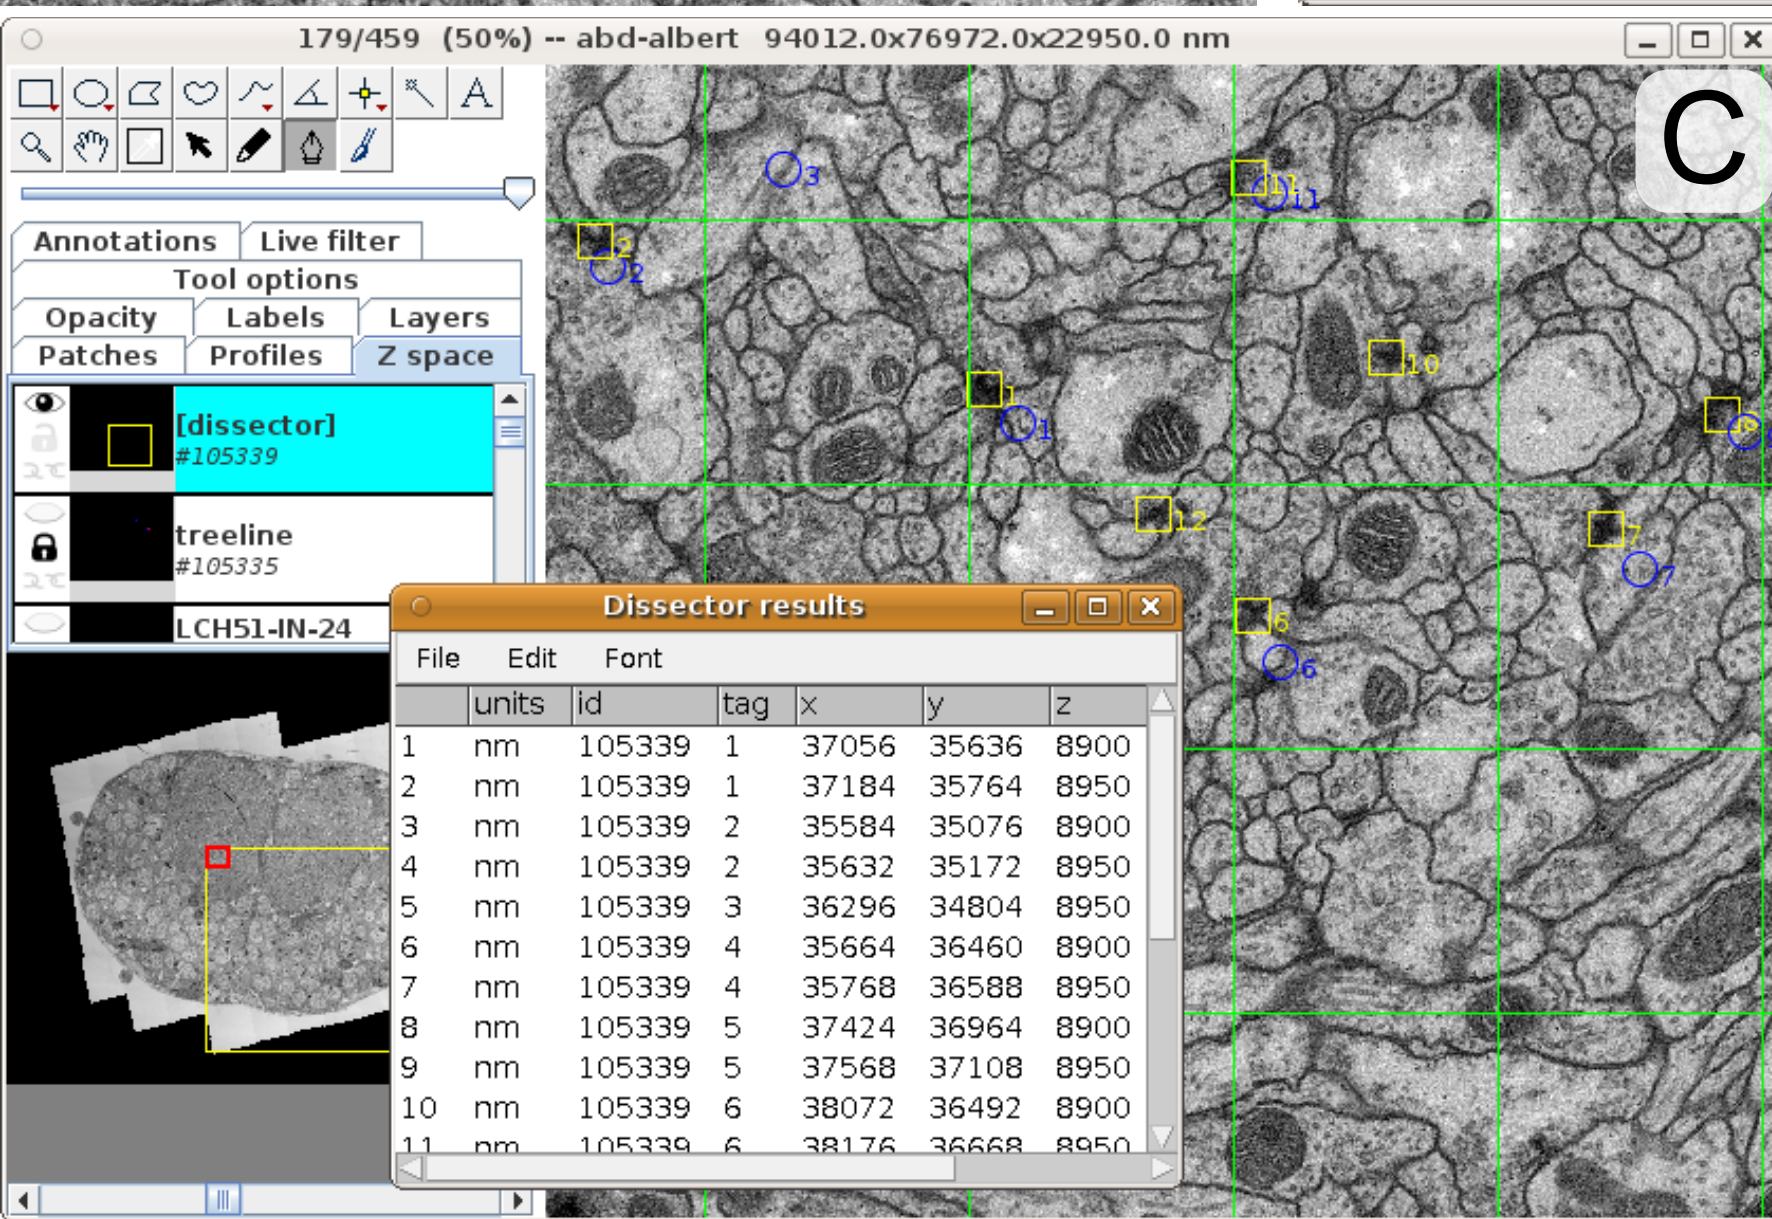

**D**

Vesicle\_to\_Surface\_statistics.py (Running)

```

File Edit Language Templates Run Tools Git Tabs
Vesicle_to_Surface_statistics.py
1 # The IDs of the Ball and AreaList instances
2 vesiclesID = 1543
3 synapticSurfaceID = 1541
4
5 # Obtain the two TrakEM2 instances
6 project = Project.getProjects()[0]
7 vesicles = project.findById(vesiclesID)
8 synapticSurface = project.findById(synapticSurfaceID)
9
10 # A set of unique vertices defining the synaptic surface
11 vertices = set(synapticSurface.generateTriangles(1, 2))
12
13 # For every vesicle, measure its shortest distance to a vertex
14 distances = [reduce(min, map(lambda v: p.distance(v), vertices))
15              for p in vesicles.asWorldPoints()]
16
17 # Compute average, median and standard deviation
18 mean = sum(distances) / len(distances)
19 stdDev = Math.sqrt(reduce(lambda s, e: s + pow(e - mean, 2),
20                          distances, 0)) / len(distances)
21 median = sorted(distances)[len(distances)/2]
22
23 print mean, stdDev, median

```

Run Kill Show Errors Clear

Started Vesicle\_to\_Surface\_statistics.py at Fri Mar 25 11:02:39 CET 2011  
98.3640799271 9.32777187286 104.904457092
